# Supplementary material for: Population Structure of Peronospora effusa in the Southwestern United States
Source: PLoS One. 2016 Feb 1;11(2):e0148385. doi: 10.1371/journal.pone.0148385 (PMC4734700; doi:10.1371/journal.pone.0148385)
Supplement: S1 Table — (XLSX) [file pone.0148385.s001.xlsx]

## Sheet: Fwd
Contig_Position	Primers		Allele Counts for 82 unique genotypes
SNP IDs	Forward	Reverse	A	C	G	T	% Alternative Allele
119_2816	GGCCTCCCTGGTAAATTGAT	AGTTGCAGCAAACGACACAG		163		1	0.609756
934_15343	AGACTCCGTCCGAGTTTCAG	ATCCACAGGCGGAAATACAC	4		160		2.43902
310_3511	GAGCGATTCCCTGTTGACTC	TGTTGCTCCTCATCCTGTGA	7		157		4.26829
635_20522	CGAAGTGATCACCGTAACGA	GGAGTATCGGGGTTGGTACA		152		12	7.31707
703_46170	CGCGTCTTGATATTGCTGAA	CAAGAAGGCACCATGTCAAA	15		149		9.14634
288_15713	CAGTTGGTGGGAGGAAAATG	TCCTGAGGCCAAATCTCATC	18		146		10.9756
87_6382	TGACGACTCCATAACGTCCA	ACCCTGCATCACAAGGAGAC			144	20	12.1951
793_2335	GGCTCGCTCACACAACTTTT	CCAAAGTCAGCTTCGACCTC	139		25		15.2439
1186_9551	ATGCTTTGAACTGCCGAGAT	TTCAAATTGACGGCGATAAA	138		26		15.8537
1027_12305	CGGCTTCATCCTCCATGATA	CAGTGGAGGAGGACCTTTTG	27		137		16.4634
148_17882	TGGCAACTTGGTTGAGGAAT	ACTGATTGCCCGCTTGAC		135		29	17.6829
795_9577	CTTTAGCTGGGAGGTGTTGG	AGCACAGACGGGTTCGTAGT	134	30			18.2927
1224_36034	ACAATAGCGGGTGCATTCAG	CTACTGAAACGCGGACCTGT	132		32		19.5122
692_12307	TGATTGTTTTCGTCTCCTTCG	CGATGGACAGTCGCTGTAAC		132		32	19.5122
76_6417	ACGCAGAGGCCTAAACAAAA	GTCACGATGGACCAGTTCAC		32		132	19.5122
809_3531	CTGTTCTTCTTGTGCCAACG	GATCCGCAAGATGAAACACA	32		132		19.5122
84_7881	GCGACGTGACAATCGTCTT	TGATTGTTCATGCGAGTGGT		131		33	20.122
234_4106	ATGTGGACTCGGCATCTCTT	GCATTGGATCGTTATGAAGC		128	36		21.9512
689_10925	GTGGTGCTGTCTTTTGCTGA	GTTGCTGGTTGGTCTCCTTC	128		36		21.9512
445_18260	CGCTATTGTTCGCGATGAT	CCAAAAAGAGCGGGTTTCTA	127		37		22.561
606_18824	AAACAATGGGTGTGGACCAT	GCTTTGATCGCACGTCATAC		39		125	23.7805
536_39392	AGCACCATCGTCGTGCTAAT	ACACCCATGACCTCCAACAT		40		124	24.3902
230_11674	GCGAAAAACTAGAGCCTGGA	ATACTGCTCGACCACGTCAA	123		41		25
597_1412	AGCCGAAATCCGTGAGTTTA	ACGACGTTATTGCGATGGAC			41	123	25
133_1010	ATTATGGCGCTCTGCTCCTA	CCGTCTATCTGCCAAGAAGG	122		42		25.6098
712_2077	AGTGCTGCTGGATCAGTGG	CTATCAGCGTCAGTGGCAAG	42		122		25.6098
37_30149	ATACGCAGAAATGGGAGCAA	TCAGCATGTCCTCTTCCTCA	44		120		26.8293
157_954	CTACGCAGTTAAGCGCTGTG	ATAGCGTGCTTAGCGGTGTT	119		45		27.439
301_957	CGTCAACGTACAGCTGCATT	TCGTCATTCGTTCCTCTTCA	47		117		28.6585
150_21870	TGGAGATGCTGGTAACGATG	GTCTTCCCGTTGGTAGCATA	55		109		33.5366
233_2053	CACTTGGAGCTCCTGGAAAC	GTGCTTAAACGGTGGTGGTC		58		106	35.3659
1054_12307	ATCGCAGCTGCTCATTCTCT	TCTGCTGACTTCGAGAACCA		62		102	37.8049
162_20472	ACGTTGCTTCGGTCTCAAGT	TCCAAGAGAGTGGAACTGGAA			101	63	38.4146
863_51377	TGGTTTCCATCTCGTCATCA	AATCATGTATGGCTCGACGAC		65		99	39.6341
638_43925	CTGTCACCAAGTGCACGACT	TTGCCACCTGAACGACTGTA	97		67		40.8537
851_9386	AAGATGCTGTCCGGGAGATT	TACCTTCTCCACCACCGTGT			97	67	40.8537
154_12147	CTCTCCATGACAAGGTGTGC	ATATCATGGCGGACACACG			69	95	42.0732
405_1475	TTCGATAACTTGCACCAGGA	ATCAGCCGAGCTGAACTTGT		69		95	42.0732
247_11808	TTCGTATGCTGCGCTAACAA	GCTTTTTCGCTGGCAATAAC	70	94			42.6829
14_20241	AGCAAGAAATTTGGGGACAA	AGCTCGAATGTTCGGAAAAA		93		71	43.2927
194_1933	CCACATACTCAACGGCTTCA	CCAGATGCCGAGCTAATGTT	72		92		43.9024
516_687	CGCACGTTTTCGTCTTTTGT	AGCTGTGGCCAGAAGGATTA	76		88		46.3415
505_1292	CAGACGACCATGTTGATTGG	TTTCAAAGTGGTCCACGACA		87		77	46.9512
524_14500	CTGATGCCGCATACTGAGAC	TCAAATCCGTGCAACACAAT	87	77			46.9512
425_3047	TCCACAGGTGCATGTTCTTC	TATGATGTGGAGCTCGATGG	86		78		47.561
6_18952	GCTTATCGGTGAACACAACG	TTATCTTTCGCCCACATGGT		84		80	48.7805

## Sheet: Rev
			Name	Sequence
	TRUE	FALSE	1027_12305	CAGTGGAGGAGGACCTTTTG
	TRUE	FALSE	1054_12307	TCTGCTGACTTCGAGAACCA
	TRUE	FALSE	1186_9551	TTCAAATTGACGGCGATAAA
	TRUE	FALSE	119_2816	AGTTGCAGCAAACGACACAG
	TRUE	FALSE	1224_36034	CTACTGAAACGCGGACCTGT
	TRUE	FALSE	133_1010	CCGTCTATCTGCCAAGAAGG
	TRUE	FALSE	14_20241	AGCTCGAATGTTCGGAAAAA
	TRUE	FALSE	148_17882	ACTGATTGCCCGCTTGAC
	TRUE	FALSE	150_21870	GTCTTCCCGTTGGTAGCATA
	TRUE	FALSE	154_12147	ATATCATGGCGGACACACG
	TRUE	FALSE	157_954	ATAGCGTGCTTAGCGGTGTT
	TRUE	FALSE	162_20472	TCCAAGAGAGTGGAACTGGAA
	TRUE	FALSE	194_1933	CCAGATGCCGAGCTAATGTT
	TRUE	FALSE	230_11674	ATACTGCTCGACCACGTCAA
	TRUE	FALSE	233_2053	GTGCTTAAACGGTGGTGGTC
	TRUE	FALSE	234_4106	GCATTGGATCGTTATGAAGC
	TRUE	FALSE	247_11808	GCTTTTTCGCTGGCAATAAC
	TRUE	FALSE	288_15713	TCCTGAGGCCAAATCTCATC
	TRUE	FALSE	301_957	TCGTCATTCGTTCCTCTTCA
	TRUE	FALSE	310_3511	TGTTGCTCCTCATCCTGTGA
	TRUE	FALSE	37_30149	TCAGCATGTCCTCTTCCTCA
	TRUE	FALSE	405_1475	ATCAGCCGAGCTGAACTTGT
	TRUE	FALSE	425_3047	TATGATGTGGAGCTCGATGG
	TRUE	FALSE	445_18260	CCAAAAAGAGCGGGTTTCTA
	TRUE	FALSE	505_1292	TTTCAAAGTGGTCCACGACA
	TRUE	FALSE	516_687	AGCTGTGGCCAGAAGGATTA
	TRUE	FALSE	524_14500	TCAAATCCGTGCAACACAAT
	TRUE	FALSE	536_39392	ACACCCATGACCTCCAACAT
	TRUE	FALSE	597_1412	ACGACGTTATTGCGATGGAC
	TRUE	FALSE	6_18952	TTATCTTTCGCCCACATGGT
	TRUE	FALSE	606_18824	GCTTTGATCGCACGTCATAC
	TRUE	FALSE	635_20522	GGAGTATCGGGGTTGGTACA
	TRUE	FALSE	638_43925	TTGCCACCTGAACGACTGTA
	TRUE	FALSE	689_10925	GTTGCTGGTTGGTCTCCTTC
	TRUE	FALSE	692_12307	CGATGGACAGTCGCTGTAAC
	TRUE	FALSE	703_46170	CAAGAAGGCACCATGTCAAA
	TRUE	FALSE	712_2077	CTATCAGCGTCAGTGGCAAG
	TRUE	FALSE	76_6417	GTCACGATGGACCAGTTCAC
	TRUE	FALSE	793_2335	CCAAAGTCAGCTTCGACCTC
	TRUE	FALSE	795_9577	AGCACAGACGGGTTCGTAGT
	TRUE	FALSE	809_3531	GATCCGCAAGATGAAACACA
	TRUE	FALSE	84_7881	TGATTGTTCATGCGAGTGGT
	TRUE	FALSE	851_9386	TACCTTCTCCACCACCGTGT
	TRUE	FALSE	863_51377	AATCATGTATGGCTCGACGAC
	TRUE	FALSE	87_6382	ACCCTGCATCACAAGGAGAC
	TRUE	#REF!	934_15343	ATCCACAGGCGGAAATACAC
